1  
2  
3  
4  
5  
6  
7  
8  
9  
10  
11  
12  
13  
14  
15  
16  
17  
18

# Machine learning predicts translation initiation sites in neurologic diseases with expanded repeats

Short title: Machine learning, translation initiation, repeat expansion  
disorders

Alec C. Gleason<sup>1</sup>, Ghanashyam Ghadge<sup>1,2</sup>, Jin Chen<sup>3</sup>, Yoshifumi Sonobe<sup>1,2</sup>, Raymond P. Roos<sup>1,2\*</sup>

<sup>1</sup>University of Chicago, Chicago, Illinois, United States of America

<sup>2</sup>Department of Neurology, University of Chicago, Chicago, Illinois, United States of America

<sup>3</sup>Department of Pharmacology, University of Texas Southwestern Medical Center, Dallas, Texas,  
United States of America

\*Corresponding author

E-mail: [rroos@neurology.bsd.uchicago.edu](mailto:rroos@neurology.bsd.uchicago.edu)

## 19 **Abstract**

20 A number of neurologic diseases, including a form of amyotrophic lateral sclerosis and others  
21 associated with expanded nucleotide repeats have an unconventional form of translation called  
22 repeat-associated non-AUG (RAN) translation. Repeat protein products accumulate and are  
23 hypothesized to contribute to disease pathogenesis. It has been speculated that the repeat regions  
24 in the RNA fold into secondary structures in a length-dependent manner, promoting RAN  
25 translation. Additionally, nucleotides that flank the repeat region, especially ones closest to the  
26 initiation site, are believed to enhance translation initiation. Recently, a machine learning model  
27 based on a large number of flanking nucleotides has been proposed for identifying translation  
28 initiation sites. However, most likely due to its extensive feature selection and limited training  
29 data, the model has diminished predictive power. Here, we overcome this limitation and increase  
30 prediction accuracy by a) capturing the effect of nucleotides most critical for translation  
31 initiation via feature reduction, b) implementing an alternative machine learning algorithm better  
32 suited for limited data, c) building comprehensive and balanced training data (via sampling  
33 *without* replacement) that includes previously unavailable sequences, and, d) splitting ATG and  
34 near-cognate translation initiation codon data to train two separate models. We also design a  
35 supplementary scoring system to provide an additional prognostic assessment of model  
36 predictions. The resultant models have high performance, with 85.00-87.79% accuracy  
37 exceeding that of the previously published model by >18%. The models presented here are then  
38 used to identify translation initiation sites in genes associated with a number of neurologic repeat  
39 expansion disorders. The results confirm a number of experimentally discovered sites of

40 translation initiation upstream of the expanded repeats and predict many sites that are not yet  
41 established.

## 42 **Abbreviations**

|       |                                              |
|-------|----------------------------------------------|
| RAN   | Repeat-associated non-AUG                    |
| RLI   | Repeat length-independent                    |
| KCS   | Kozak consensus sequence                     |
| KSS   | Kozak similarity score                       |
| AUROC | Area under receiver operating characteristic |
| ROC   | Receiver operating characteristic            |
| RFC   | Random forest classifier                     |

## 43 **Introduction**

44 More than 40 neurologic diseases are caused by expansions of repeat nucleotide sequences in  
45 causative genes. The repeats range from three nucleotides, such as ‘CTG’ associated with  
46 myotonic dystrophy Types I and II, to up to 12 nucleotides, such as ‘CCCCGCCCGCG’,  
47 associated with progressive myoclonus epilepsy. Protein products translated from expanded  
48 repeat sequences tend to accumulate and aggregate, and have been proposed to contribute to  
49 disease [1-9]. Interestingly, in some cases, the repeats have been shown to be translated in all  
50 three reading frames from both the plus and minus strands of the RNA [10] by a process termed  
51 repeat-associated non-AUG (RAN) translation. It is believed that an affinity of translational  
52 machinery to folded regions of the RNA may underlie translation of the repeat sequences.  
53 Translation may occur from sequences in a repeat length-independent (RLI) mechanism.  
54 Regardless of repeat length, sequences may be ordered in such a way that they naturally increase  
55 the affinity of translational machinery to initiate at a particular codon. In such a process,  
56 translation may initiate not only within the repeat region, but also from sites upstream of the  
57 repeat sequences. In this case, repeat peptides will be produced if a stop codon is not encountered  
58 by the translational machinery before encountering the repeats. The large number of nucleotides  
59 that comprise and precede repeat sequences make the identification of RLI translation initiation  
60 sites challenging without proper laboratory evidence or computational methods.

61 A machine learning model called TITER has been proposed to predict all translation initiation  
62 sites in a given sequence. It addresses multiple limitations of the only other such model (to our  
63 best knowledge) [11, 12] and remains an important predictive tool. It appears, however, that the  
64 large feature selection of TITER and limited training data impair its predictive accuracy. The

65 predictive models described in our investigations have 85.00-87.79% accuracy that exceeds that  
66 of TITER. Our models reduce the feature selection to capture the effect of ten critical nucleotides  
67 that flank both sides of a putative translation initiation codon since a number of studies have  
68 demonstrated a strong impact of nucleotides within this range on translation initiation [13-20].  
69 We also introduce two models tailored for ATG or near-cognate codons because of their  
70 differences in initiating translation [21, 22]. The models described here use an alternative  
71 machine learning algorithm better suited for limited data [23]. We also present unbiased training  
72 data through sampling techniques *without* replacement, using gene sequences that have been  
73 unavailable to TITER. Finally, we generate a scoring metric to supplement model predictions.  
74 The models confirm nearly all experimentally established translation initiation sites upstream of  
75 repeats and, importantly, predict multiple sites that have not yet been investigated.

76

77

## 78 **Results**

### 79 **Kozak similarity score algorithm**

80 Before applying machine learning, we evaluated the performance of a more straightforward  
81 algorithm that uses a limited number of nucleotides as predictors of translation initiation. This  
82 algorithm was designed to predict the ability of a codon to initiate translation based on the  
83 similarity of its surrounding sequence profile to the Kozak consensus sequence (KCS). The KCS  
84 is a nucleotide motif, identified to most frequently border the canonical translation initiation  
85 codon (ATG) and optimize translation initiation at the site. Although there exist slight variations,

86 this motif is typically accepted as the conserved pattern of the following underlined nucleotides  
87 bordering the AUG codon: CCRCCAUGG. The nucleotide designated by R is a purine, most  
88 typically adenine [13].

89 The sequence logo of the KCS (Fig 1) has been used to produce weighted scorings of identified  
90 translation initiation codons and observe notable trends. The sequence logo illustrates conserved  
91 nucleotides that tend to border ATG codons that initiate translation. The vertical length of each  
92 letter in the sequence logo is related to the observed probability for a particular nucleotide to be  
93 at a certain position, as well as the impact of the position on the efficiency of translation  
94 initiation. It is formulated by the Shannon method [24].

95

96 **Fig 1. Schematic of the Kozak Similarity Score Algorithm.** Based on the sequences flanking an input  
97 codon, the algorithm references the KCS Sequence Logo to assign the codon a score.

98

99 We designed a weighted scoring algorithm based on the KCS sequence logo and the ten bases  
100 preceding and following a codon. Each nucleotide of the 23-base sequence has a value assigned  
101 equal to the height of the nucleotide at its respective position, as illustrated in Fig 1. If a  
102 nucleotide is not present in a position, it is assigned a value of zero. These values are then  
103 summated, and the total divided by the maximal possible summated score (had each nucleotide  
104 in the sequence been assigned the largest possible value for its position). This division serves to  
105 make final values more feasible for interpretation. As opposed to the pre-normalized score range  
106 of about 0 to 0.5990, scores derived from the normalization procedure more conveniently range

107 from 0 to 1. Overall, the final output score, referenced as Kozak similarity score (KSS), of a  
108 codon is deduced by expression:

$$KSS(\text{codon}) = \frac{1}{KSS_{max}} \sum_{p=1}^{20} bits(\text{nucleotide}_p)$$

109 In this expression,  $p$  denotes the position of a nucleotide bordering the codon. Values  $p=1, 2, 3,$   
110  $\dots, 10$  designate the positions of the ten nucleotides (from left to right) on the left side of the  
111 codon, whereas values  $p=11, 12, 13, \dots, 20$  designate the positions of ten nucleotides (from left  
112 to right) on the right side of the codon. Furthermore,  $bits(\text{nucleotide})$  is the assigned height of a  
113 particular nucleotide with reference to the KCS sequence logo (Fig 1).  $KSS_{max}$  is the maximum  
114 possible KSS that can be calculated for a codon.

115 We then used this algorithm on the sequences flanking known instances of ATG translation  
116 initiation and produced a histogram distribution of the resulting scores (Fig 2). We created two  
117 baselines to compare the scoring of ATG translation initiation codons against ATG codons that  
118 do not initiate translation. For the first baseline, we ran the algorithm on one hundred thousand  
119 ‘dummy’ ATG codons that had completely randomized sequences without missing nucleotides  
120 (a randomized adenine, cytosine, thymine, or guanine in every position flanking the codons) and  
121 graphed the resulting score distribution. For the second, we ran the algorithm on a series of ATG  
122 codons derived from the human genome that are believed not to initiate translation.

123

124 **Fig 2. Kozak Similarity Scores of ATG Translation Initiation Codons Against Baseline.**

125

126 As these histograms were generated from large datasets, they could more accurately serve as  
127 representations of algorithm scoring for respective codon classifications: codons that initiate  
128 translation, mixture of codons that initiate translation and do not initiate translation, and codons  
129 that do not initiate translation, respectively.

130 Of note, the histogram in Fig 2 representing a randomized combination of codons that initiate  
131 and do not initiate translation, is centered at about 0.59 for both the mean and median. In  
132 contrast, in the histogram representing ATG codons that initiate translation, we observed a left-  
133 skewed distribution, with mean and median scores of about 0.73 and 0.74, respectively. In the  
134 histogram representing ATG codons expected not to initiate translation, we observed a slightly  
135 right-skewed distribution, with mean and median scores of about 0.52 and 0.53, respectively.

136 Although exact sequences bordering near-cognate initiation codons have not been identified, as  
137 has been carried out for the canonical ATG initiation codon (the KCS), current literature points  
138 out similarities between the two sequences. For instance, in a bioinformatics study that analyzed  
139 sequences bordering forty-five mammalian near-cognate initiation codons (including CUG,  
140 GUG, UUG, AUA, and ACG), a guanine or cytosine has been shown to frequent the -6 position  
141 (6 bases upstream of the codon) [25]. As shown in Fig 1, a guanine or cytosine is also most  
142 prevalent in the KCS at this position. The same study also noted the presence of a purine  
143 (adenine or guanine) in the -3 position from the codon, which are the two most likely nucleotides  
144 to occur in the same position of the KCS [25]. In a study of CUG near-cognate codons, those that  
145 most frequently initiated translation had an adenine in the -3 position [26]. Although the  
146 frequencies of adenine and guanine in the -3 position of the KCS are similar, analysis suggests  
147 that adenine is more conserved. For example, if the nucleotide weightings in the KCS are  
148 analyzed, adenine is conserved in about 47% of cases at the position versus that of guanine, with

149 about 37% conservation. Both the bioinformatics study as well as a publication analyzing peptide  
150 translation from CUG-initiating mRNA constructs show enhanced translation when guanine is at  
151 the +4 position (1 base downstream of the initiation codon) [18, 25]. In the KCS, guanine is most  
152 conserved at the +4 position as well.

153 Because of these similarities, we decided to apply the algorithm to score known near-cognate  
154 codons that have been shown to initiate translation (Fig 3). Interestingly, distributions of all  
155 results are left-skewed, visibly differing from results derived from scoring of ‘dummy’ codons  
156 with randomized flanking sequences, as well as codons expected not to initiate translation. In  
157 particular, the distribution of scores for known CTG codons has mean and median of about 0.69.  
158 The distribution of scores for known GTG codons has mean and median of about 0.69 and 0.70,  
159 respectively. And the distribution of scores for known TTG codons has mean and median of  
160 about 0.65. These results are an indication that the KSS of near-cognate codons can be used to  
161 predict their ability to initiate translation.

162

163 **Fig 3. Kozak Similarity Scores of Near-Cognate Translation Initiation Codons Against Baseline.**

164

165 To use the KSS as a predictor of translation initiation ability, a threshold score has to first be  
166 determined. In this way, an algorithm could classify codons with a score above the threshold as  
167 initiating translation, and below it, not initiating translation. To find the best threshold, virtual  
168 simulations were run using different score cutoffs to classify already known ATG initiation  
169 codons and ATG codons expected not to initiate translation. Since there are at least 12,603 cases  
170 of known ATG initiation codons in contrast to at least 34,097 ATG codons believed not to  
171 initiate translation, the data were first balanced. In this way, the cut-off derived would not bias

172 classifications of codons in favor of not initiating translation. Next, all possible cutoff values  
173 were set, ranging from 0.580 to 0.700 by increments of 0.001. This range was determined by  
174 contrasting distributions in Fig 2. For each of these cutoff values, one thousand simulations were  
175 run classifying the data of 12,603 known ATG translation initiation codons on a randomized  
176 subset containing 12,603 of the total 34,097 non-initiating ATGs. Errors were averaged for the  
177 one thousand runs at each cutoff value. A cutoff of about 0.64 had the most minimized error.  
178 When tested on data containing the 12,603 known ATG-initiating codons and randomized  
179 12,603 instances of non-initiating ATGs, the average accuracy of the model was about 79.85%.  
180 The area under receiver operating characteristic (AUROC) score from one of the thousand model  
181 simulations (selected at random) was calculated to be 0.876. This score is a useful metric as it  
182 indicates the model's discriminatory ability. In the model context, it would correctly assign a  
183 greater prediction value for a codon to initiate translation if it indeed were a translation initiation  
184 codon 87.6% of the time [27]. A random classifier has a score of 0.5, whereas a perfect classifier  
185 has a score of 1.0 [28]. This score is calculated as the area under the ROC curve. This is a  
186 graphical illustration of the model's ability to correctly categorize positives (true positive rate)  
187 against decreased discrimination (increased false positive rate).

188 As carried out in the case of ATG, the cumulative data of the CTG, GTG, and TTG codons was  
189 used to deduce a cutoff value for the algorithm's scoring of all near-cognate codons. To identify  
190 the best cutoff for near-cognate codons, the same simulation process was used as was carried out  
191 for ATG codons. Using this simulation method, with balanced near-cognate codon data  
192 consisting of equal numbers of positives (near-cognate initiation codons) and negatives (near-  
193 cognate codons that do not initiate translation), the best cutoff of the algorithm classification was  
194 about 0.61 for near-cognate codons. After a thousand simulations, the algorithm revealed an

195 average accuracy of about 75.60% for classifying near-cognate codons as initiating translation or  
196 not initiating translation. The AUROC score calculated from one randomly selected simulation  
197 was 0.835.

198

199 **Fig 4. Error Classifying ATG and Near-Cognate Codon Ability to Initiate Translation Using Kozak**  
200 **Similarity Score.**

201

202 **Fig 5. ROC Curves of the ATG and Near-Cognate Kozak Similarity Score Classifiers.** The AUROC  
203 score (area under the curve) of the ATG classifier is equal to 0.876. The AUROC score of the near-  
204 cognate RFC is equal to 0.835.

205

206

## 207 **KSS as a reference for likelihood of translation initiation**

208 In the previous section, the weighted scoring algorithm based on the KCS was used as a model to  
209 classify whether codons could initiate translation. However, one could question whether the  
210 scores of the weighting system could also be used as a metric. To investigate this issue, 12,603  
211 instances of ATGs that initiate translation and 34,097 ATGs believed not to initiate translation  
212 were compiled. One thousand balanced test datasets, containing the 12,603 positive ATG  
213 instances along with randomly sampled negative ATG instances of the same number, were  
214 gathered. The average proportion of codons that initiate translation with a KSS exceeding  
215 particular values, across all test datasets was determined. These KSS thresholds ranged from zero  
216 to one by increments of 0.02. The proportion of ATGs that initiate translation had a positive  
217 correlation with the KSS. In other words, a greater proportion of ATGs would initiate translation

218 with an increased score. This score appeared useful since one could approximate the proportion  
219 of ATG codons that initiate translation with equal KSSs to a particular codon encountered.

220 The same evaluation was conducted for near-cognate codons to deduce if there was a similar  
221 trend. The procedures previously applied to the ATG data were used for the cumulative total of  
222 2,413 instances of near-cognate codons that initiate translation, and 141,071 instances of near-  
223 cognate codons believed not to initiate translation. There was a positive correlation between the  
224 proportion of near-cognate codons that initiate translation and the KSS. In fact, the trend was  
225 quite similar to that obtained for ATG data. The KSS was not limited as a metric for ATG  
226 codons, but could be used to estimate the likelihood of a near-cognate codon to initiate  
227 translation as well.

228 The results of the analysis for ATG and near-cognate codons is shown in the graph and table of  
229 Fig 6.

230

231 **Fig 6. Proportion of ATG and Near-Cognate Codons that Initiate Translation with KSSs Above**  
232 **Certain Values.** The graph and table were both generated to depict the same results, evaluated from  
233 balanced data, i.e., an equal background proportion of positives and negatives.

234

235

## 236 **Random forest classifiers**

237 A strong and practical approach for identifying translation initiation codons also includes the  
238 application of a machine learning model. Machine learning models are powerful, as they can  
239 analyze large amounts of complex data, determine patterns and codependences that are difficult  
240 to process by a human, and learn from mistakes to improve over time [29]. Although biological

241 pathways are often sophisticated and produce remarkably diverse data, machine learning models  
242 can provide direction for such processes that are not completely understood.

243 We decided to implement a random forest classifier (RFC). This machine learning algorithm  
244 typically produces good results with partly missing data, bears little impact from outliers, and  
245 mitigates overfitting. Furthermore, the RFC is a highly preferred model in contemporary  
246 genomics [30]. The RFC is based on many decision trees, typically generated from large subsets  
247 of data. As each decision tree may split data differently in the classification process, the  
248 averaging of many such trees reduces variance and helps avoid overfitting. With an overfit  
249 model, data inputs that vary slightly from trained data could have volatile classifications that are  
250 not reliable. The RFC, which implements the averaging process, may produce greater accuracy  
251 than any one decision tree alone [31].

252 Accordingly, an RFC was implemented as a separate algorithm to elucidate whether codons  
253 initiate translation. To create such an algorithm, the feature variables of codons for the RFC to be  
254 trained on were first assigned. For an ATG classifier, these variables designated the ten  
255 nucleotides that preceded the codon, and ten that followed it. This range was chosen as studies  
256 suggest that alterations of bases in some of these positions are highly impactful, and may define  
257 whether a flanked codon is an “optimal, strong, [or] moderate” translation initiation site [13-20].  
258 Although secondary structures can influence translation, which are dependent on a number of  
259 nucleotides that may far exceed our incorporated range, successful identification of feature  
260 patterns may require exceptionally large amounts of training data that are currently unavailable.  
261 This is because the number of training samples required to differentiate data increases  
262 exponentially as the number of attributes in a model increases [32]. Since five features are  
263 needed to designate whether a nucleotide at each position,  $n$ , is either adenine, guanine, cytosine,

264 thymine, or missing, 5<sup>n</sup> distinct data (enough to cover all possible data variations) may be  
265 required for a model to best approximate the impact of each nucleotide, for every position that is  
266 considered. By having our models trained on a narrowed scope of nucleotides known to  
267 influence translation initiation, we sought to optimize predictive power with limited data. For a  
268 near-cognate codon classifier, we included additional features to designate the nucleotide in the  
269 first base position of the codons (i.e., the underlined: CTG, GTG, TTG). This is because the  
270 nucleotide at this position may significantly impact translation initiation from these codons [21,  
271 22].

272 Using the package, imbalanced-learn, in Python, we created the RFC models [33]. The ATG  
273 RFC was trained using an imbalanced set of 12,603 ATG codons known to initiate translation  
274 (positives), and 3,433 of 34,097 generated distinct ATG codons that are believed not to initiate  
275 translation (negatives). The set of 3,433 negatives consisted of the total of 1,805 sequences that  
276 were not missing nucleotides, and 1,628 (i.e., ten percent fewer) randomly sampled negatives of  
277 the remaining 31,697 that were missing nucleotides. We left out five percent of the total 3,433  
278 negatives used (172 ATGs that do not initiate translation), as well as the same number of  
279 positives (172 ATG translation initiation codons) from the training data to constitute our test  
280 dataset. In this way, accuracy would be based on unbiased data that was balanced with 344  
281 combined cases of equally occurring positives and negatives.

282 The accuracy of the RFC model on the balanced 344 cases was 87.79%. In other words, the  
283 algorithm correctly categorized 302 of the 344 ATGs, based on the sequences flanking each  
284 codon. This accuracy is high in comparison to the 79.85% accuracy achieved using the KSS-  
285 based classifier. We also calculated the area under receiver operating characteristic (AUROC)  
286 score of the model to be 0.948, which is high as well. Increasing the parameter value designating

287 the total number of decision trees included in the RFC had no visible effect on model  
288 performance. Other parameters were also best left unchanged for optimal predictions.  
289 The same procedure was used to create an RFC for near-cognate codons as carried out for ATG  
290 codons, using data available for all near-cognate codons. To prevent imbalanced data bias in the  
291 accuracy measurement for the near-cognate RFC, data that was equally representative of all near-  
292 cognate codons was set aside to form the test dataset. As the model was trained on CTG, GTG,  
293 and TTG initiation codons, twenty positives and negatives were randomly isolated for each of  
294 these codons prior to training. When run on this separated, balanced set of 120 data points, the  
295 trained near-cognate RFC performed with 85.00% accuracy. The AUROC score of the near-  
296 cognate classifier was calculated to be 0.938.

297

298 **Fig 7. ROC Curves of the ATG and Near-Cognate Random Forest Classifiers.** The AUROC score  
299 (area under the curve) of the ATG RFC is equal to 0.948. The AUROC score of the near-cognate RFC is  
300 equal to 0.938.

301

302

### 303 **Analysis of the TITER neural network as a benchmark**

304 To our knowledge, there exist only two other models for predicting both ATG and near-cognate  
305 translation initiation codons. The latest is the TITER machine learning algorithm [11], which  
306 addresses limitations of the first model. We analyzed TITER as a benchmark to compare it with  
307 the performance of our presented models.

308 TITER is a deep learning-based framework that predicts whether a codon initiates translation  
309 based on the product of two calculations, which is termed TISScore. One constituent is based on  
310 the frequency of the codon of interest (e.g., ATG, CTG, GTG, etc.) in the dataset to initiate  
311 translation. The second involves the averaging of calculated scores for a codon with flanking  
312 sequences across thirty-two neural networks. A large number of neural networks was used as  
313 part of a bootstrapping technique to account for training data imbalance.

314 Although TITER has a high AUROC score of 0.891 [11], ROC curves can present an “overly  
315 optimistic” evaluation of a model’s performance “if there is a large skew in the class  
316 distribution” [27, 28]. This evaluation is based on the true positive and false positive rates of the  
317 model – and an imbalance of positives and negatives may distort its calculation [34]. One  
318 questions whether the test sample of the model is skewed as it consists of 767 positive and 9,914  
319 negative samples in total [11]. Although the authors noted special procedures to account for the  
320 data imbalance of the training dataset, it is not clear if such procedures were used for the test  
321 dataset.

322 Since TITER was open-source, TITER’s accuracy was averaged across a hundred balanced  
323 subsets from its test dataset. Using all 767 positive samples, 767 negatives were randomly  
324 sampled from the 9,914 total negatives, across the hundred runs to account for the data  
325 imbalance. Through this technique, the unbiased average of the model accuracy was calculated  
326 to be 66.94%. This was the accuracy achieved by the best cutoff, 0.5, of the TISScore for  
327 classification. When run on the same sequences comprising the RFC test datasets (with  
328 sequences extended to include the additional features TITER was trained with), TITER  
329 demonstrated 62.21% and 58.33% accuracy for ATG and near-cognate codons, respectively.  
330 These values were lower than the 75.60% and 79.85% accuracy achieved using the KSS scoring

331 system for ATG or near-cognate codons, or the 85.00% and 87.79% accuracy achieved using  
332 RFC models. The fact that TITER was trained with less data than the RFC models presented here  
333 could account for reduced predictive power. Specifically, it was generated using 9,776 positive  
334 samples and 94,899 negatives compared to the total 15,016 positives and 175,168 negatives used  
335 for the RFCs.

336 The performance of TITER may also be a result of the large number of features that this machine  
337 learning model incorporated. Although contemporary research suggests a few bases that flank a  
338 codon greatly influence translation initiation from the site [13-20], TITER analyzes a total of two  
339 hundred bases that flank each codon. Compared to our approach of analyzing ten preceding and  
340 proceeding nucleotides, TITER may implement up to  $180 \times 5 = 900$  additional features. The  
341 expression ‘ $180 \times 5$ ’ is used because any one base at the 180 extra positions is represented by five  
342 features to designate whether the base is adenine, guanine, cytosine, tyrosine, or is missing.  
343 Although the TITER publication mentions feature reduction in the hidden layer of the neural  
344 networks, it is not clear how much feature reduction occurred and whether features with  
345 significant correlations were inadvertently reduced. An excess of features may decrease  
346 effectiveness in machine learning because the number of training samples required to  
347 differentiate the data increases exponentially as the number of attributes in a model increases.  
348 Thus, predictive power is lost. In fact, this phenomenon is termed the “curse of dimensionality”  
349 in Data Science [32].

350 In addition to feature reduction, our implementation of the random forest classifier, which is  
351 more robust to outliers and erroneous instances (especially when data is limited), creation of two  
352 models to account for properties of different data types (i.e., ATG codons versus near-cognate

353 codons), and use of sampling *without* replacement which preserves natural variations found in  
354 data (in place of bootstrapping) could explain our improved model performance.

355

356 **Fig 8. ROC Curves of All ATG and Near-Cognate Classifiers Derived from Same Test Data.** All  
357 classifiers were run on the ATG and Near-cognate RFC test datasets, and their ROC curves were  
358 superimposed. The AUROC scores of the ATG and near-cognate RFCs are 0.948 and 0.938, respectively.  
359 The AUROC scores of the ATG and near-cognate KSS classifiers are 0.857 and 0.787 on these test  
360 datasets. TITER's AUROC scores are 0.622 and 0.603 for ATG and near-cognate codons, respectively.

361

362

### 363 **Model selection and integration into software**

364 Of the two types of models created, the RFCs appeared the best model to use for predicting  
365 translation initiation sites. With accuracy determined from the balanced test dataset for ATGs at  
366 87.79% and for near-cognate codons at 85.00%, their performance exceeds that of the  
367 straightforward KSS-based classifiers. To our best knowledge, the RFCs also outperform all  
368 other models designed for the same function, including TITER, which they exceed by more than  
369 18% in accuracy. As a next step, we decided to use the RFCs to identify repeat-length-  
370 independent (RLI) translation initiation associated with neurologic diseases.

371 To do this, the RFC models were implemented into software. Developed in Python, the program  
372 could be used to evaluate a total sequence consisting of the upstream region, followed by ten  
373 nucleotide sequence repeats to represent the repeat expansion. Ten sequence repeats may be  
374 adequate to capture the repeat expansion effect on translation initiation from upstream codons as

375 well as codons within the repeat expansion itself because ten nucleotide sequence repeats are at  
376 minimum thirty bases long, and the integrated model only uses the ten bases that flank each side  
377 of a codon for analysis. Nucleotides within this range have been shown to strongly impact  
378 translation initiation [13-20].

379 The model can scan through each codon in the sequence and return a prediction from the  
380 implemented RFCs. If a codon encountered is ‘ATG,’ then the ATG RFC with 87.79% accuracy  
381 predicts whether it initiates translation based on the ten sequences flanking each side of the  
382 codon. Otherwise, if the codon encountered is a near-cognate codon, then the near-cognate RFC  
383 with 85.00% accuracy predicts whether it initiates translation via the same procedure. Next, the  
384 program virtually simulates translation from each predicted codon and filters out those instances  
385 in which a stop codon (TAG, TGA, or TAA) is encountered upstream of the repeat expansion.  
386 This feature was implemented to remove codons from consideration if their initiated translation  
387 would not reach the repeat expansion and produce the pathogenic repeat proteins that are  
388 associated with neurologic disease. Then, the program would determine the repeated nucleotide  
389 sequence that would be translated from each predicted initiation codon, as well as the associated  
390 translation product. Finally, the program outputs a visualization of the input sequence, with  
391 predicted codons color-coded to distinguish the associated product translated.

392 In the figures that follow, nucleotides have a bold font to distinguish initiation codons that the  
393 software models were trained on. These codons include canonical start codon ATG, and near-  
394 cognate codons CTG, GTG, and TTG. Because the features of the three near-cognate codons  
395 were used to extrapolate classifications of the other, less researched near-cognate codons (AAG,  
396 AGG, ACG, ATC, ATT, and ATA), it is possible to incur false predictions for these less studied  
397 instances. Thus, these six near-cognate codons are designated only with color-coding without

398 bolding to denote that they should be acknowledged with less confidence. If there is an overlap  
399 between predicted initiation codons (i.e., one or two nucleotides overlap between predicted  
400 codons), the color of the overlapped region is the same as that of the next predicted codon to  
401 prevent confusion. The overlapped region may or may not be bolded depending on whether the  
402 software was trained on this next codon. We also output the KSSs of each predicted codon to two  
403 decimal points, as the score could be a useful metric to evaluate translation initiation likelihood.  
404 This may be approximated through comparison of KSSs of a codon to the reference table and  
405 graph (Fig 6).

406

407 **Fig 9. An Example of the Formatting Scheme in Software Output.** This example shows predicted  
408 codons that are color-coded based on their reading frame: 'ATT,' 'TTG,' 'CTG,' 'AGG,' 'GTG,' and  
409 'CTG.' Codons that the models were trained on show up with bold formatting. If there is an overlap  
410 between predicted initiation codons (i.e., one or two nucleotides overlap between predicted codons), the  
411 color of the overlapped region is the same as the color of the next predicted codon.

412

413

## 414 **Software ability to identify known RLI translation initiation sites**

415 After the software was completed, its ability to distinguish RLI translation initiation sites was  
416 analyzed. We first identified translation initiation codons upstream of repeats in the following  
417 genes in which RAN translation is known to occur: *C9orf72* (associated with amyotrophic lateral  
418 sclerosis and frontotemporal dementia), *FMR1* (associated with fragile X and fragile X-  
419 associated tremor/ataxia syndrome), *DMI* (associated with myotonic dystrophy type 1), and

420 *HDL2* (associated with Huntington disease-like 2) genes. These examples were used as  
 421 references for software performance. It should be noted that translation initiation codons  
 422 identified for DM1 were obtained from an experiment that implemented a slightly modified  
 423 version of the conventional DM1 antisense strand. The strand had been experimentally modified  
 424 to determine whether changes in its sequence could induce translation initiation from particular  
 425 codons [35]. Next, the associated upstream regions and repeat expansion sequences for each  
 426 gene, as recorded in the National Center for Biotechnology Information database, were input into  
 427 the software. Predictions were generated in order to determine whether they corresponded to  
 428 experimentally confirmed translation initiation codons (Table 1).

**Table 1.** Previously identified RLI translation initiation sites from publications.

| Gene                                                               | Codon | Number of Bases Upstream of Repeat | Peptide Repeat Translated | Kozak Similarity Score |
|--------------------------------------------------------------------|-------|------------------------------------|---------------------------|------------------------|
| <b><i>C9orf72</i> (Sense) [4]</b>                                  | AGG   | 1                                  | Poly-GR                   | 0.66                   |
|                                                                    | CTG   | 24                                 | Poly-GA                   | 0.69                   |
| <b><i>C9orf72</i> (Antisense) [4]</b>                              | ATG   | 194                                | Poly-PG                   | 0.61                   |
| <b><i>FMR1</i> (Sense) [36, 37]</b>                                | GTG   | 11                                 | Poly-G                    | 0.70                   |
|                                                                    | ACG   | 35                                 | Poly-G                    | 0.80                   |
|                                                                    | ACG   | 60                                 | Poly-G                    | 0.71                   |
| <b><i>DM1</i> (Antisense) with slightly modified sequence [35]</b> | ATC   | 7                                  | Poly-A                    | 0.61                   |
|                                                                    | ATG   | 17                                 | Poly-S                    | 0.66                   |
|                                                                    | ATT   | 23                                 | Poly-S                    | 0.74                   |
| <b><i>HDL2</i> (Antisense) [35]</b>                                | ATC   | 6                                  | Poly-Q                    | 0.74                   |

429 Comparison between the predictions and experimentally identified translation initiation codons  
 430 demonstrated high performance of the software. In fact, all translation initiation sites previously

431 identified across existing publications were correctly identified by the RFCs with one exception:  
432 ATC, which was found experimentally to initiate translation in the modified *DMI* antisense  
433 strand seven bases upstream of the repeat [35]. However, the near-cognate RFC model  
434 successfully predicted all other instances of translation initiation from less researched near-  
435 cognate codons. This accuracy is surprising considering that the near-cognate RFC model was  
436 only trained on instances of CTG, GTG and TTG translation. As there was insufficient data to  
437 train the model on less used near-cognate codons (ATA, ATC, ATT, AGG, ACG, and AAG),  
438 predictions for these codons were extrapolated based on recognized patterns from CTG, GTG,  
439 and TTG examples. However, for the same reason that they were not included in model training,  
440 near-cognate codons that are not CTG, GTG, or TTG should be acknowledged with less  
441 confidence in predictions, out of concern they may be false positives.

442

## 443 **Predicted Translation Initiation Sites Associated with Neurologic** 444 **Diseases**

445 Experimentally identified translation initiation codons for *C9orf72*, *FMRI*, *DMI*, and *HDL2*  
446 were confirmed by the model presented here (Table 1, Figs 10 and 11). As the software  
447 performed well, it was then used to predict translation initiation codons associated with repeats  
448 in neurologic diseases that have not been experimentally identified. The software was also used  
449 to make predictions for translation initiation codons for other genes with repeats associated with  
450 neurologic repeat diseases, *HTT*, and *DM2* (Fig 12). Predicted translation initiation codons with  
451 relatively high KSSs were noted for all analyzed genes (Table 2). In all cases, predicted

452 translation initiation sites are not shown if they have a downstream stop codon located in the  
453 same reading frame before the repeat.

454

455 **Fig 10. Predicted Translation Initiation Codons for *C9orf72* and *FMRI*.** Predicted codons that the  
456 models were trained on show up with bold formatting. Numbers indicate the number of bases upstream of  
457 the repeat.

458 \* A predicted translation initiation codon overlaps with the repeat (AGG, located 1 base upstream).

459 **Fig 11. Predicted Translation Initiation Codons for *DM1* and *HDL2*.** Predicted codons that the models  
460 were trained on show up with bold formatting. Numbers indicate the number of bases upstream of the  
461 repeat.

462 \* Every CTG within the repeat is predicted to possibly initiate translation.

463 † Every CTG within repeat, aside from the first one, is predicted to possibly initiate translation.

464 **Fig 12. Predicted Translation Initiation Codons for *HTT* and *DM2*.** Predicted codons that the models  
465 were trained on show up with bold formatting. Numbers indicate the number of bases upstream of the  
466 repeat.

467 \* Every CTG within the repeat, aside from the first one, is predicted to possibly initiate translation.

468 † Two predicted translation initiation codons are within repeat.

469

470

471

472

473

**Table 2.** Translation Initiation Codons with High Kozak Similarity Scores per Translated Polypeptide Repeat\*

| Codon                             | Number of Bases Upstream of Repeat | Kozak Similarity Score | Translated Polypeptide Repeat |
|-----------------------------------|------------------------------------|------------------------|-------------------------------|
| <b><i>C9orf72</i> (Sense)</b>     |                                    |                        |                               |
| CTG                               | 24                                 | 0.66                   | Poly-GA                       |
| AGG                               | 1                                  | 0.69                   | Poly-GR                       |
| <b><i>C9orf72</i> (Antisense)</b> |                                    |                        |                               |
| <b>ATG<sup>†</sup></b>            | 113                                | 0.75                   | Poly-PG                       |
| AAG                               | 350                                | 0.84                   | Poly-PG                       |
| ACG                               | 3                                  | 0.79                   | Poly-PR                       |
| AAG                               | 288                                | 0.73                   | Poly-PR                       |
| AAG                               | 384                                | 0.77                   | Poly-PR                       |
| <b><i>FMR1</i> (Sense)</b>        |                                    |                        |                               |
| AGG                               | 18                                 | 0.83                   | Poly-R                        |
| ACG                               | 60                                 | 0.71                   | Poly-R                        |
| ACG                               | 35                                 | 0.79                   | Poly-G                        |
| <b>GTG</b>                        | 38                                 | 0.76                   | Poly-G                        |
| AAG                               | 332                                | 0.83                   | Poly-G                        |
| <b><i>FMR1</i> (Antisense)</b>    |                                    |                        |                               |
| AGG                               | 28                                 | 0.71                   | Poly-A                        |
| <b>GTG</b>                        | 26                                 | 0.73                   | Poly-R                        |
| <b>CTG</b>                        | 56                                 | 0.70                   | Poly-R                        |
| ATT                               | 105                                | 0.81                   | Poly-P                        |
| AAG                               | 156                                | 0.78                   | Poly-P                        |
| AAG                               | 177                                | 0.85                   | Poly-P                        |
| <b>CTG</b>                        | 195                                | 0.74                   | Poly-P                        |
| AGG                               | 207                                | 0.84                   | Poly-P                        |
| ATC                               | 252                                | 0.80                   | Poly-P                        |
| AGG                               | 318                                | 0.74                   | Poly-P                        |
| <b><i>DM1</i> (Sense)</b>         |                                    |                        |                               |
| AAG                               | 23                                 | 0.62                   | Poly-C                        |
| AGG                               | 61                                 | 0.77                   | Poly-A                        |
| <b>CTG</b>                        | -1                                 | 0.67                   | Poly-L                        |
| <b><i>DM1</i> (Antisense)</b>     |                                    |                        |                               |
| <b>CTG</b>                        | 34                                 | 0.87                   | Poly-A                        |
| AGG                               | 169                                | 0.85                   | Poly-A                        |
| ATC                               | 193                                | 0.81                   | Poly-A                        |
| ACG                               | 98                                 | 0.86                   | Poly-S                        |
| <b><i>HDL2</i> (Sense)</b>        |                                    |                        |                               |
| ATC                               | 72                                 | 0.71                   | Poly-L                        |
| ATC                               | 68                                 | 0.52                   | Poly-C                        |
| AGG                               | 10                                 | 0.84                   | Poly-A                        |
| <b><i>HDL2</i> (Antisense)</b>    |                                    |                        |                               |
| ATC                               | 6                                  | 0.74                   | Poly-Q                        |
| AAG                               | 27                                 | 0.80                   | Poly-Q                        |
| ATT                               | 261                                | 0.81                   | Poly-Q                        |
| <b>GTG</b>                        | 372                                | 0.83                   | Poly-Q                        |

|                        |     |      |           |
|------------------------|-----|------|-----------|
| <b>GTG</b>             | 378 | 0.71 | Poly-Q    |
| <b>CTG</b>             | 122 | 0.68 | Poly-S    |
| ATC                    | 67  | 0.69 | Poly-A    |
| <b>HTT (Sense)</b>     |     |      |           |
| AAG                    | 27  | 0.76 | Poly-Q    |
| <b>CTG</b>             | 33  | 0.72 | Poly-Q    |
| <b>CTG</b>             | 42  | 0.87 | Poly-Q    |
| <b>ATG</b>             | 51  | 0.89 | Poly-Q    |
| AAG                    | 210 | 0.72 | Poly-Q    |
| <b>CTG</b>             | 348 | 0.74 | Poly-Q    |
| ACG                    | 187 | 0.75 | Poly-A    |
| <b>GTG</b>             | 202 | 0.85 | Poly-A    |
| <b>HTT (Antisense)</b> |     |      |           |
| ATC                    | 213 | 0.76 | Poly-L    |
| AGG                    | 225 | 0.70 | Poly-L    |
| AAG                    | 330 | 0.73 | Poly-L    |
| <b>CTG</b>             | 342 | 0.70 | Poly-L    |
| AGG                    | 369 | 0.76 | Poly-L    |
| <b>GTG</b>             | 13  | 0.84 | Poly-A    |
| <b>GTG</b>             | 118 | 0.72 | Poly-A    |
| <b>CTG</b>             | 199 | 0.81 | Poly-A    |
| <b>CTG</b>             | 229 | 0.71 | Poly-A    |
| <b>GTG</b>             | 337 | 0.73 | Poly-A    |
| <b>DM2 (Sense)</b>     |     |      |           |
| <b>CTG</b>             | 7   | 0.50 | Poly-CLPA |
| <b>CTG</b>             | -5  | 0.61 | Poly-LPAC |
| ATT                    | 87  | 0.66 | Poly-PACL |
| <b>DM2 (Antisense)</b> |     |      |           |
| AGG                    | 7   | 0.72 | Poly-GRQA |
| <b>GTG</b>             | 58  | 0.70 | Poly-GRQA |
| ATA                    | 88  | 0.75 | Poly-GRQA |
| AGG                    | 47  | 0.71 | Poly-RQAG |
| AGG                    | 113 | 0.74 | Poly-RQAG |
| AGG                    | 15  | 0.72 | Poly-QAGR |

\*Predicted codons are displayed that have KSSs above 0.70. If no KSSs within a reading frame are above 0.70, then the codon with the highest KSS is presented – as in the case of the *C9orf72* sense strand.

† Bolded codons represent codons that the RFCs were trained on.

474

475 Results displayed in the figures and table indicate translation initiation sites for proteins  
 476 translated from the repeat. Of note, the average KSS of all upstream predicted codons is about  
 477 0.66. With reference to the table in Fig 6, approximately 80% of ATG and near-cognate codons  
 478 with a score above 0.65 are estimated to initiate translation from a background population of

479 equally occurring translation initiation codons (positives) and codons believed not to initiate  
480 translation (negatives).

481 With respect to the *C9orf72* sense strand upstream from the repeat, the software predicts a codon  
482 to initiate translation of poly-GA, and another to translate poly-GR. Both of these codons have  
483 been confirmed through experimentation [4]. In the antisense strand, there are ten codons that  
484 could initiate translation of poly-PR, and six predicted with respect to poly-PG. The ATG located  
485 194 bases upstream of the repeat expansion has been confirmed [4].

486 Predictions for translation initiation codons from the *FMRI* sense strand upstream from the  
487 repeat identify nine codons that could be used to initiate translation of poly-G, and two for poly-  
488 R. The predicted GTG located 11 bases upstream, the ACG located 35 bases upstream, and ACG  
489 located 60 bases upstream, have been confirmed experimentally [36]. The antisense upstream  
490 region has a total of sixteen codons predicted to initiate translation of poly-P, three for poly-R,  
491 and one for poly-A.

492 For the *DM1* sense strand upstream from the repeat, the software predicts three codons that  
493 initiate translation of poly-C, and two that initiate translation of poly-A. Interestingly, every CTG  
494 within the CTG repeat expansion is predicted to initiate translation of poly-L; however, only the  
495 first has a relatively high KSS (0.67). Predictions for the DM1 antisense strand are different from  
496 those produced for the experimentally modified DM1 antisense strand (Table 1). Namely, there  
497 is no predicted ATG located 17 bases upstream of the repeat expansion, nor a predicted ATT  
498 located 23 bases upstream of the repeat expansion, since sequences that border the predicted  
499 codons in the modified strand differ from those bordering the same codons in the unmodified  
500 version. In the unmodified antisense strand, there are seven codons predicted to initiate poly-A  
501 translation, and one to initiate translation of poly-S. Also, there are no predicted translation

502 initiation codons in the reading frame of poly-Q which suggests that this polypeptide might be  
503 initiated from the repeat expansion, possibly by repeat length-dependent folding.

504 With respect to the *HDL2* sense strand upstream from the repeat, the software predicts seven  
505 codons to initiate translation of poly-L, one to initiate translation of poly-C, and two to initiate  
506 translation of poly-A. Furthermore, the software suggests that every CTG of the CTG repeat  
507 expansion, aside from the first one in the sense strand, can initiate translation of poly-L. In the  
508 antisense strand, there are seventeen codons predicted to initiate translation of poly-Q, three for  
509 poly-S, and two for poly-A. The predicted ATC located 6 bases upstream of the repeat expansion  
510 in the antisense strand has been confirmed [35].

511 Predictions for translation initiation codons from the *HTT* sense strand upstream from the repeat  
512 identify seventeen codons that initiate translation of poly-Q, and four for poly-A. From the  
513 antisense upstream region, sixteen codons are predicted to initiate translation of poly-L, and nine  
514 for poly-A. The software also suggests that every CTG of the CTG repeat expansion, aside from  
515 the first one in the antisense strand can initiate translation of poly-L.

516 Predictions for the *DM2* sense strand upstream from the repeat identify five codons used for  
517 translation initiation of poly-PACL, two for poly-CLPA, and three for poly-LPAC. Moreover,  
518 the software predicts the first two CTGs of the CCTG repeat expansion to initiate translation of  
519 poly-LPAC. In the antisense strand, there are three codons predicted to initiate poly-RQAG  
520 translation, five to initiate translation of poly-GRQA, and one to initiate translation of poly-  
521 QAGR.

522

523

## 524 **Discussion**

525 As shown here, RFCs were able to successfully predict most translation initiation codons  
526 associated with neurologic repeat expansion diseases that were experimentally identified. The  
527 same models also predicted other codons to initiate translation of repeat expansions for  
528 neurologic diseases, that have not been identified. Of note, this software predicted translation  
529 initiation sites with more than 18% accuracy than the TITER neural network.

530 Regardless of the quality of a model, its predictions should not be interpreted as evidence.  
531 Instead, predictions should be recognized as likely possibilities that warrant further investigation.  
532 The significance of the algorithm's identification of translation initiation codons, however,  
533 should not be understated. For example, these data may be important to use to guide treatment of  
534 these repeat diseases.

535 Although the machine learning models show promise in understanding of the pathogenesis of  
536 repeat expansion neurologic disorders, their use may be extended to other applications as well.  
537 For example, they may be used to predict the translation initiation that are not involved in repeat  
538 expansion disorders. One benefit of this implementation includes the ability to speculate protein  
539 products from a nucleotide sequence, quickly and easily and without laboratory procedures. In  
540 order to accelerate the use of the RFCs, a version of the machine learning software that can  
541 predict translation initiation codons in any provided sequence is available (at  
542 [www.tispredictor.com/tis](http://www.tispredictor.com/tis)).

543

## 544 **Enhancing Performance**

545 Like other machine learning models, RFC performance is determined by the amount of available  
546 training data. Because of this constraint, collecting more examples to train the machine learning  
547 models could prove especially useful. In the case of the near-cognate RFC, obtaining sufficient  
548 data to account for all near-cognate types could lessen uncertainty in predictions involving these  
549 codons. Training the two RFCs discussed here with more of the codon types that have been used  
550 would be beneficial since feeding a model with more data will verify existing trends, and  
551 introduce variations that the algorithm can recognize and link to a particular classification,  
552 thereby improving accuracy.

553

554

## 555 **Materials and Methods**

### 556 **Data acquisition**

557 Examples of translation initiation were mostly obtained from ribosome profiling, mass  
558 spectroscopy, and CRISPR-based techniques across different human cell types and under  
559 different conditions [38]. These data include sequences of 12,094 examples of translation  
560 initiated from ATG, as well as 2,180 examples of translation initiated from near-cognate codons.  
561 Translation initiation sites were also captured by quantitative translation initiation sequencing of  
562 genes in cultured human kidney cells [39]. Their annotated sequences were collected from the

563 Ensembl gene annotation system (version 84) [40]. These methods procured 509 and 203 more  
564 examples of ATG and near-cognate initiation codons, respectively. In all, we collected 12,603  
565 instances of translation initiation from ATG, and 2,413 instances of translation initiation from  
566 near-cognate codons to use in this study.

567 To obtain examples in which translation does not initiate from ATG (negatives), we used the  
568 same transcripts from which positives were derived and recorded nucleotides that flanked ATG  
569 codons. Then, we eliminated all instances in which flanking sequences matched any of the  
570 12,603 sequences bordering the known ATG translation initiation sites, leaving 34,097  
571 negatives. We repeated the same procedure to identify negatives for near-cognate codons that do  
572 not initiate translation. We found examples of CTG, GTG, and TTG codons in which flanking  
573 sequences did not match any of that of the known near-cognate initiation codons, leaving  
574 141,071 negatives.

575

## 576 **Random Sampling**

577 All random sampling was conducted without replacement. This method is preferred for KSS  
578 evaluations of ATG and near-cognate codons, as the precision of population estimates is higher  
579 than that produced by sampling with replacement [41]. Furthermore, sampling without  
580 replacement to generate training datasets introduces greater variation for model training.

581

## 582 **Random forest classifiers**

583 Using the open-source package, imbalanced-learn, in Python, we created the RFC models [33].

584 The ATG RFC was trained on an imbalanced set of 12,432 ATG codons known to initiate

585 translation (positives), and 3,261 ATG codons that are believed not to initiate translation  
586 (negatives). The set of 3,261 negatives consisted of 1,716 sequences that were not missing  
587 nucleotides, and 1,545 (ten percent fewer) randomly sampled negatives of the remaining 31,697  
588 that were missing nucleotides. To clarify, missing nucleotides are registered in the case that a  
589 recorded codon is located exceedingly close to the 5' or 3' terminus of an mRNA construct. In  
590 such a circumstance, there may not be a full ten bases both preceding and following the codon.  
591 The sampling technique was performed to slightly offset the proportion of negatives with and  
592 without missing bases in the opposite direction. In this way, more negatives without missing  
593 bases would be used for model training. Using the original imbalanced set of negatives, with the  
594 majority missing bases, would cause the model to inaccurately assess the effect of missing  
595 nucleotides on a codon's ability to initiate translation. Furthermore, using a slightly larger  
596 proportion of negatives that had a complete sequence profile resulted in improved accuracy for  
597 distinguishing codons that were not missing nucleotides. This is useful, as sequences are less  
598 often encountered with missing nucleotides in real-world applications.

599 To account for the imbalance of positives and negatives, the RFC had decision trees generated  
600 from 3,576 negatives, and the same number of randomly sampled positives. One thousand such  
601 trees were used, since this number is generally recommended as a starting point for the  
602 generation of an RFC [42]. Of the total number of features,  $n$ , a total of  $\sqrt{n}$  features were used to  
603 classify the data in order to optimize predictive power. Training with too many or too few  
604 features could have prevented the model from recognizing the best indicators for classification  
605 [42]. Each decision tree also had the requirement of grouping at least two codon instances to a  
606 certain classification. This constraint reduced the risk of overfitting, yet still allowed tree  
607 capacity to differentiate between subtly differing codons. Thus, the trees could better identify

608 precise feature patterns to associate with a particular classification, and remain reliable in face of  
609 new, unencountered data.

610 We evaluated the accuracy of the RFC model with the above configurations. Parameters such as  
611 the minimum number of codons to group for classification could then be adjusted to improve  
612 predictive power, as necessary. However, parameters were best left unchanged for optimal  
613 predictions. To create a separate classifier for near-cognate codons, we repeated the same  
614 procedures to create an RFC for near-cognate codons as we had carried out for ATG codons, this  
615 time using data available for all near-cognate codons.

616

## 617 **Accessibility and implementation**

618 The software is publicly accessible as an interactive website at [www.tispredictor.com](http://www.tispredictor.com).

619 [Availability Statement for Open Access Models and Data]

620

621

622

623

624

625

626

## 627 **References**

- 628 1. La Spada AR, Taylor JP. Repeat expansion disease: Progress and puzzles in disease  
629 pathogenesis. *Nat Rev Genet.* 2010;11(4):247-58.
- 630 2. Davis M, Stroud C, editors. Neurodegeneration: Exploring Commonalities Across  
631 Diseases: Workshop Summary. Forum on Neuroscience and Nervous System Disorders; 2013;  
632 Washington (DC): National Academies Press (US).
- 633 3. Rudich PD, Watkins S, Lamitina T. PolyQ-independent toxicity associated with novel  
634 translational products from CAG repeat expansions. *PLoS One.* 2020;15(4).
- 635 4. Boivin M, Pfister V, Gaucherot A, Ruffenach F, Luc N, Sellier C, et al. Reduced  
636 autophagy upon C9ORF72 loss synergizes with dipeptide repeat protein toxicity in G4C2 repeat  
637 expansion disorders. *EMBO J.* 2020;39(4):e100574.
- 638 5. Boivin M, Deng J, Pfister V, Grandgirard E, Oulad-Abdelghani M, Mortlet B, et al.  
639 Translation of GGC repeat expansions into a toxic polyglycine protein in NIID defines a novel  
640 class of human genetic disorders: The polyG diseases. *Neuron.* 2021;109(11):1825-35.
- 641 6. Lee S-J, Hee-Sun L, Masliah E, Lee H-J. Protein aggregate spreading in  
642 neurodegenerative diseases: Problems and perspectives. *Neurosci Res.* 2011;70(4):339-48.
- 643 7. Monaco A, Fraldi A. Protein Aggregation and Dysfunction of Autophagy-Lysosomal  
644 Pathway: A Vicious Cycle in Lysosomal Storage Diseases. *Frontiers in Molecular Neuroscience.*  
645 2020.
- 646 8. Ross CA, Poirier MA. Protein aggregation and neurodegenerative disease. *Nat Med.*  
647 2004;10 Suppl:S10-7. Epub 2004/07/24. doi: 10.1038/nm1066. PubMed PMID: 15272267.

- 648 9. Chung CG, Lee H, Lee SB. Mechanisms of protein toxicity in neurodegenerative  
649 diseases. *Cellular and Molecular Life Sciences*. 2018;75(17):3159-80. doi: 10.1007/s00018-018-  
650 2854-4.
- 651 10. Krans A, Skariah G, Zhang Y, Bayly B, Todd PK. Neuropathology of RAN translation  
652 proteins in fragile X-associated tremor/ataxia syndrome. *Acta Neuropathologica*  
653 *Communications*. 2019;7(1).
- 654 11. Zhang S, Hu H, Jiang T, Zhang L, Zeng J. TITER : predicting translation initiation sites  
655 by deep learning. *Bioinformatics*. 2017;33:i234–i42.
- 656 12. Reuter K, Biehl A, Koch L, Helms V. PreTIS: A Tool to Predict Non-canonical 5' UTR  
657 Translational Initiation Sites in Human and Mouse. *PLOS Computational Biology*.  
658 2016;12(10):e1005170. doi: 10.1371/journal.pcbi.1005170.
- 659 13. Hernández G, Osnaya VG, Pérez-Martínez X. Conservation and Variability of the AUG  
660 Initiation Codon Context in Eukaryotes. *Trends in Biochemical Sciences*. 2019;44(12):1009-21.
- 661 14. Meijer HA, Thoma AAM. Control of eukaryotic protein synthesis by upstream open  
662 reading frames in 5'-untranslated region of an mRNA. *Biochem*. 2002;367:1-11.
- 663 15. Pisarev AV, Kolupaeva VG, Pisareva VP, Merrick WC, Hellen CUT, Pestova TV.  
664 Specific functional interactions of nucleotides at key -3 and +4 positions flanking the initiation  
665 codon with components of the mammalian 48S translation initiation complex. *Genes Dev*.  
666 2006;20:624-36.
- 667 16. Lütcke HA, Chow KC, Mickel FS, Moss KA, Kern HF, Scheele GA. Selection of AUG  
668 initiation codons differs in plants and animals. *Embo J*. 1987;6(1):43-8.
- 669 17. Kozak M. At least six nucleotides preceding the AUG initiator codon enhance translation  
670 in mammalian cells. *J Mol Bio*. 1987;196(4):947-50.

- 671 18. Kozak M. Recognition of AUG and alternative initiator codons is augmented by G in  
672 position +4 but is not generally affected by the nucleotides in positions +5 and +6. *Embo J.*  
673 1997;16(9):2482-92.
- 674 19. Kozak M. Point mutations define a sequence flanking the AUG initiator codon that  
675 modulates translation by eukaryotic ribosomes. *Cell.* 1986;44(2):283-92.
- 676 20. Kozak M. Context effects and inefficient initiation at non-AUG codons in eucaryotic  
677 cell-free translation systems. *Mol Cell Biol.* 1989;9(11):5073-80.
- 678 21. Wei J, Zhang Y, Ivanov IP, Sachs MS. The stringency of start codon selection in the  
679 filamentous fungus *Neurospora crassa*. *J Biol Chem.* 2013;288(13):9549-62. Epub 2013/02/08.  
680 doi: 10.1074/jbc.M112.447177. PubMed PMID: 23396971.
- 681 22. Kearse MG, Wilusz JE. Non-AUG translation: a new start for protein synthesis in  
682 eukaryotes. *Genes Dev.* 2017;31(17):1717-31. Epub 2017/10/07. doi: 10.1101/gad.305250.117.  
683 PubMed PMID: 28982758; PubMed Central PMCID: PMC5666671.
- 684 23. Libbrecht MW, Noble WS. Machine learning in genetics and genomics. *Nat Rev Genet.*  
685 2015;16(6):321-32.
- 686 24. Schneider TD, Stephens RM. Sequence logos: a new way to display consensus  
687 sequences. *Nucleic Acids Research.* 1990;18(20):6097-100.
- 688 25. Wegrzyn J. L. DTM, Valafar F., Hook V. Bioinformatic analyses of mammalian 5'-UTR  
689 sequence properties of mRNAs predicts alternative translation initiation sites. *BMC*  
690 *Bioinformatics.* 2008.
- 691 26. Schwab SR, Shugart JA, Horng T, Malarkannan S, Shastri N. Unanticipated Antigens:  
692 Translation Initiation at CUG with Leucine. *PLoS Biology.* 2004;2(11):e366.

- 693 27. Davis J, Goadric M. The relationship between Precision-Recall and ROC curves. *ICML*.  
694 2006:233-40.
- 695 28. Saito T, Rehmsmeier M. The Precision-Recall Plot Is More Informative than the ROC  
696 Plot When Evaluating Binary Classifiers on Imbalanced Datasets. *PLOS ONE*. 2015.
- 697 29. Libbrecht M. W. NWS. Machine learning in genetics and genomics. *Nat Rev Genet*.  
698 2015;16(6):321-32.
- 699 30. Goldstein BA, Polley EC, Briggs FBS. Random Forests for Genetic Association Studies.  
700 *Stat Appl Genet Mol Biol*. 2011;10(1):32.
- 701 31. Liu Y, Wang Y, Zhang J. New Machine Learning Algorithm: Random Forest. *ICICA*.  
702 2012;7473:246-52.
- 703 32. Friedman JH. On Bias, Variance, 0/1—Loss, and the Curse-of-Dimensionality. *Data*  
704 *Mining and Knowledge Discovery* volume. 1997;1(1):55–77.
- 705 33. Lemaître G, Nogueira F, Aridas CK. Imbalanced-learn: A Python Toolbox to Tackle the  
706 Curse of Imbalanced Datasets in Machine Learning. *JMLR*. 2017;18(17):1-5.
- 707 34. Fawcett T. ROC Graphs: Notes and Practical Considerations for Researchers. *Pattern*  
708 *Recognition Letters*. 2004;31(8):1-38.
- 709 35. Zu T, Gibbens B, Doty NS, Gomes-Pereira M, Huguet A, Stone MD, et al. Non-ATG-  
710 initiated translation directed by microsatellite expansions. *Proc Natl Acad Sci U S A*.  
711 2010;108(1):260-5.
- 712 36. Rodriguez CM, Wright SE, Kearse MG, Haenfler JM, Flores BN, Liu Y, et al. A native  
713 function for RAN translation and CGG repeats in regulating fragile X protein synthesis. *Nature*  
714 *Neuroscience*. 2020;23:386–97.

- 715 37. Kearse MG, Green KM, Krans A, Rodriguez CM, Linsalata AE, Goldstrohm AC, et al.  
716 CGG Repeat associated non-AUG translation utilizes a cap-dependent, scanning mechanism of  
717 initiation to produce toxic proteins. *Mol Cell*. 2016;62(2):314-22.
- 718 38. Chen J, Brunner A-D, Cogan JZ, Nunez JK, Fields AP, Adamson B, et al. Pervasive  
719 functional translation of noncanonical human open reading frames. *Science*. 2020;367:1140–6.
- 720 39. Gao X, Wan J, Liu B, Ma M, Shen B, Qian S-B. Quantitative profiling of initiating  
721 ribosomes in vivo. *Nature Methods*. 2015;12(2):147-53.
- 722 40. Aken BL, Ayling S, Barrell D, Clarke L, Curwen V, Fairley S, et al. The Ensembl gene  
723 annotation system. *Database (Oxford)*. 2016.
- 724 41. Seth GR, Rao JNK. On the Comparison between Simple Random Sampling with and  
725 without Replacement. *Sankhyā: The Indian Journal of Statistics, Series A (1961-2002)*.  
726 1964;26(1):85-6.
- 727 42. Johnson K, Kuhn M. *Applied Predictive Modeling*. New York: Springer; 2013.



Figure 1

# Kozak Similarity Scores of Known ATG Translation Initiation Codons Against Baseline

bioRxiv preprint doi: <https://doi.org/10.1101/2021.08.17.456657>; this version posted August 17, 2021. The copyright holder for this preprint (which was not certified by peer review) is the author/funder, who has granted bioRxiv a license to display the preprint in perpetuity. It is made available under aCC-BY 4.0 International license.



Figure 2

# Kozak Similarity Scores of Known Near-Cognate Translation Initiation Codons Against Baseline

bioRxiv preprint doi: <https://doi.org/10.1101/2021.08.17.456657>; this version posted August 17, 2021. The copyright holder for this preprint (which was not certified by peer review) is the author/funder, who has granted bioRxiv a license to display the preprint in perpetuity. It is made available under aCC-BY 4.0 International license.



- 1,514 Known CTG Translation Initiation Codons
- 543 Known GTG Translation Initiation Codons
- 356 Known TTG Translation Initiation Codons
- 100,000 Codons With Randomized Flanking Sequences
- 141,071 CTG, GTG, and TTG Codons Believed Not to Initiate Translation

Figure 3

### Codon Classification Error as a Function of Score Cutoff



Figure 4

# ROC Curves of Kozak Similarity Score Classifiers



Figure 5

# Proportion of Codons that Initiate Translation With Kozak Similarity Scores Above Certain Values



| <b>Kozak Similarity Score</b> | <b>Proportion of ATGs that Initiate Translation above Kozak Similarity Score</b> | <b>Proportion of Near-Cognate Codons that Initiate Translation Above Kozak Similarity Score</b> |
|-------------------------------|----------------------------------------------------------------------------------|-------------------------------------------------------------------------------------------------|
| <b>0.00</b>                   | 0.5000                                                                           | 0.5000                                                                                          |
| <b>0.05</b>                   | 0.5000                                                                           | 0.5000                                                                                          |
| <b>0.10</b>                   | 0.5000                                                                           | 0.5000                                                                                          |
| <b>0.15</b>                   | 0.5001                                                                           | 0.5000                                                                                          |
| <b>0.20</b>                   | 0.5033                                                                           | 0.5035                                                                                          |
| <b>0.25</b>                   | 0.5098                                                                           | 0.5110                                                                                          |
| <b>0.30</b>                   | 0.5206                                                                           | 0.5224                                                                                          |
| <b>0.35</b>                   | 0.5375                                                                           | 0.5412                                                                                          |
| <b>0.40</b>                   | 0.5618                                                                           | 0.5683                                                                                          |
| <b>0.45</b>                   | 0.5933                                                                           | 0.6015                                                                                          |
| <b>0.50</b>                   | 0.6302                                                                           | 0.6406                                                                                          |
| <b>0.55</b>                   | 0.6789                                                                           | 0.6893                                                                                          |
| <b>0.60</b>                   | 0.7364                                                                           | 0.7469                                                                                          |
| <b>0.65</b>                   | 0.7938                                                                           | 0.8011                                                                                          |
| <b>0.70</b>                   | 0.8496                                                                           | 0.8541                                                                                          |
| <b>0.75</b>                   | 0.8948                                                                           | 0.9067                                                                                          |
| <b>0.80</b>                   | 0.9393                                                                           | 0.9458                                                                                          |
| <b>0.85</b>                   | 0.9682                                                                           | 0.9753                                                                                          |
| <b>0.90</b>                   | 0.9908                                                                           | 0.9779                                                                                          |
| <b>0.95</b>                   | 1.0000                                                                           | No codons above score                                                                           |

Figure 6

# RFC Receiver Operating Characteristic Curves



Figure 7

# Receiver Operating Characteristic Curves of Codon Classifiers (Derived from Same Data)



Figure 8

TACCTTGTAGAAAGCGCCATTGGAGCCCGCACTTCCACCCAGCTCCTCCATCTTCTCTTCAGC  
CCTGCTAGCGCCGGGAGCCCGCCCGAGAGGTGGCTGCGGGCGGCTCGAGGCC

Figure 9

### C9orf72 (Sense):

Reading Frame: Poly-GA = blue, Poly-GR = purple

CTGGA<sup>24</sup>ACTCAGGAGTCGCGCGCTAGGGGCC(GGGGCC)<sub>n</sub><sup>1</sup>\*

### C9orf72 (Antisense)

Poly-PR reading frame = blue, Poly-PG reading frame = purple

AAGCCGCGCGCCGCCACCCTCCGGCCTTCCCCAGGGCAGAGCAGGCTCTCAGTACCCGAGGCTCC<sup>492</sup>  
CTTTTCTCGAGCCCGCAGCGGCAGCGCTCCCAGCGGGTCCCCGGGAAGGAGACAGCTCGGGTA<sup>384</sup>  
CTGAGGGCGGGAAAGCAAGGAAGAGGCCAGATC<sup>366</sup>CCCATCCCTTGTCCCTGCGCCGCCGCCGCC<sup>350</sup>  
GCCGCCGCCGCCGGGAAGCCCGGGGCCCGGATGCAGGCAATTCCACCAGTCGCTAGAGGCGAA<sup>288</sup>  
AGCCCGACACCCAGCTTCGGTCAGAGAAATGAGAGGGGAAAGTAAAAATGCGTCGAGCTCTGAGG<sup>273</sup>  
AGAGCCCCCGCTTCTACCCGCGCCTCTTCCCGGCAGCCGAACCCCAAACAGCCACCCGCCAGGA<sup>264</sup><sup>113</sup>  
TGCCGCCTCCTCACTCACCCACTCGCCACCGCCTGCGCCTCCGCCGCCGCGGGCGCAGGCACC<sup>194</sup>  
GCAACCGCAGCCCCGCCCGGGCCCGCCCCGGGCCCGCCCCGACCAACG(CCCCGG)<sub>n</sub><sup>182</sup><sup>179</sup>

bioRxiv preprint doi: <https://doi.org/10.1101/2021.08.17.456657>; this version posted August 17, 2021. The copyright holder for this preprint (which was not certified by peer review) is the author/funder, who has granted bioRxiv a license to display the preprint in perpetuity. It is made available under aCC-BY 4.0 International license.

### FMR1 (Sense)

Reading Frame: Poly-G = blue, Poly-R = purple

CTGAGTGCACCTCTGCAGAAATGGGCGTTCTGGCCCTCGCGAGGCAGTGCGACCTGTCACCGCC<sup>419</sup>  
CTTCAGCCTTCCCGCCCTCCACCAGCCCGCGCACGCCCGGCCCGCGCGTCTGCTTTTCGACCC<sup>407</sup>  
GGCACCCCGGCCGGTTCCAGCAGCGCGCATGCGCGCGCTCCCAGGCCACTTGAAGAGAGAGG<sup>332</sup>  
GCGGGGCCGAGGGGCTGAGCCCGCGGGGGGAGGGAAACAGCGTTGATCACGTGACGTGGTGGTTTCA<sup>305</sup>  
GTGTTTACACCCGCAGCGGGCCGGGGGTTTCGGCCTCAGTCAGGCGCTCAGCTCCGTTTCGGTTT<sup>176</sup>  
CACTTCCGGTGGAGGGCCGCCTCTGAGCGGGCGGGCCGACCGCGAGCGCGGGCGGGCGGC<sup>125</sup>  
GGTGACGGAGGCGCCGCTGCCAGGGGGGCCTGCGGCAGCG(CGG)<sub>n</sub><sup>60</sup>  
<sup>38</sup> <sup>35</sup> <sup>23</sup> <sup>18</sup> <sup>11</sup>

### FMR1 (Antisense)

Reading Frame: Poly-P = blue, Poly-R = purple, Poly-A = green

CTGCCCGGCCCTCGCCCATCCCCAGCTCACCCGGCGGGGCTCGGCGCCGAAAGAGAACCC<sup>414</sup>  
TCTCCTCGCTGGTCTCTCATTTCGATAGGCGCTAGGGCCTCTCGGAGTCGGAGAGGGGCTTCCAA<sup>318</sup>  
CAGGCCCAAGTCCAGTCCTTCCCTCCCAACAACATCCCGCCGAGCGTGCCCTGGCACCCAGGC<sup>285</sup>  
GCGGTGCTCGGGAAGAGGGCCCGGGCCTCCCGCCGACACCAGGAAGAAAAGGAGGGA<sup>252</sup>  
AGGAAGGGCGAAGATGGGGCCTGCCCTAGAGCCAAGTACCTTGTAGAAAGCGCCATTGGAGCCC<sup>240</sup>  
CGCACTTCCACCACCAGCTCCTCCATCTTCTTTCAGCCCTGCTAGCGCCGGGAGCCCCGCC<sup>177</sup> <sup>174</sup> <sup>168</sup>  
GAGAGTGGGCTGCGGGCGCTCGAGGCCAG(CCG)<sub>n</sub><sup>159</sup> <sup>156</sup> <sup>105</sup> <sup>104</sup>  
<sup>28</sup> <sup>56</sup>  
<sup>26</sup> <sup>21</sup>

Figure 10
